# Supplementary material
Source: Elsevier journal article supplement (https://www.sciencedirect.com/science/article/pii/S0212656715003790)
Supplement: mmc1 [file S0212656715003790:mmc1.docx]

Material adicional para Internet

Descripción sociodemográfica de los/as participantes en los grupos focales

| Programa formativo | Tipo de formación | Provincia  (número  participantes) | Perfil sociodemográfico de las personas participantes | | | | |
| --- | --- | --- | --- | --- | --- | --- | --- |
|  |  |  | Sexo | Edad | Años DM2 | Nivel de estudios | Ocupación |
| *Paciente Activo*  (País Vasco) | Taller para  pacientes | San Sebastián  (6 personas) | Hombre | 62 años | 2 años | Superiores | Jubilado |
| Hombre | 76 años | 21 años | Primarios | Jubilado |
| Hombre | 68 años | 24 años | Primarios | Jubilado |
| Mujer | 55 años | 12 años | Medios | Ama de casa |
| Mujer | 72 años | familiar | Medios | Ama de casa |
| Mujer | 70años | familiar | Primarios | Ama de casa |
| Bilbao  (6 personas) | Hombre | 69 años | 6 años | Medios | Jubilado |
| Mujer | 50 años | 30 años | Medios | Azafata |
| Hombre | 63 años | familiar | Primarios | Peón |
| Hombre | 55 años | 3 años | Primarios | Jubilado |
| Mujer | 45 años | 3 años | Superiores | Abogada |
| Mujer | 62 años | 10 años | Medios | Administrativa |
| Taller para pacientes- instructores | San Sebastián  (8 personas) | Hombre | 49 años | 10 años | Superiores | Abogado |
| Hombre | 73 años | 10 años | Superiores | Jubilado |
| Hombre | 56 años | 3 años | Medios | Formador |
| Hombre | 66 años | 7 años | Superiores | Jubilado |
| Hombre | 62 años | 5 años | Primarios | Jubilado |
| Hombre | 61 años | 7 años | Superiores | Jubilado |
| Hombre | 62 años | 10 años | Medios | Jubilado |
| Mujer | 57 años | 5 años | Medios | Ama de casa |
| Bilbao  (6 personas) | Hombre | 57 años | 18 años | Medios | Jubilado |
| Mujer | 64 años | 17 años | Superiores | Jubilada |
| Mujer | 62 años | 20 años | Medios | Administrativa |
| Hombre | 69 años | 7 años | Superiores | Jubilado |
| Hombre | 62 años | 7 años | Primarios | Jubilado |
| Mujer | 49 años | 9 años | Medios | Baja laboral |
| *Escuela de Pacientes* (Andalucía) | Curso para pacientes | Huelva  (8 personas) | Mujer | 63 años | 31 años | Primarios | Ama de casa |
| Mujer | 50 años | 10 años | Primarios | Ama de casa |
| Hombre | 50 años | 5 años | Primarios | Albañil |
| Mujer | 36 años | familiar | Medios | Camarera |
| Mujer | 44 años | familiar | Primarios | Ama de casa |
| Mujer | 46 años | 3 años | Medios | Administrativa |
| Mujer | 42 años | 9 meses | Primarios | Peona |
| Hombre | 22 años | 3 meses | Medios | Peón |
| Granada  (4 personas) | Hombre | 47 años | familiar | Básicos | Conductor |
| Mujer | 42 años | 1 año | Básicos | Ama de casa |
| Hombre | 56 años | 8 años | Medios | Jubilado |
| Mujer | 54 años | 16 años | Superiores | Gestor |
| Curso para pacientes-formadores | Huelva  (3 personas) | Hombre | 49 años | 25 años | Superiores | Arquitecto |
| Mujer | 48 años | familiar | Superiores | Ama de casa |
| Mujer | 52 años | familiar | Superiores | Enfermera |
| Granada  (3 personas) | Hombre | 67 años | 30 años | Medios | Jubilado |
| Mujer | 63 años | familiar | Superiores | Jubilada |
| Hombre | 55 años | 3 años | Superiores | Empresario |
